# Supplementary material
Source: Springer Nature journal article supplement (https://www.springermedizin.de/resource/supplementary/13054_2010_8821_MOESM2_ESM.pdf/9732652)

(a) Whole blood

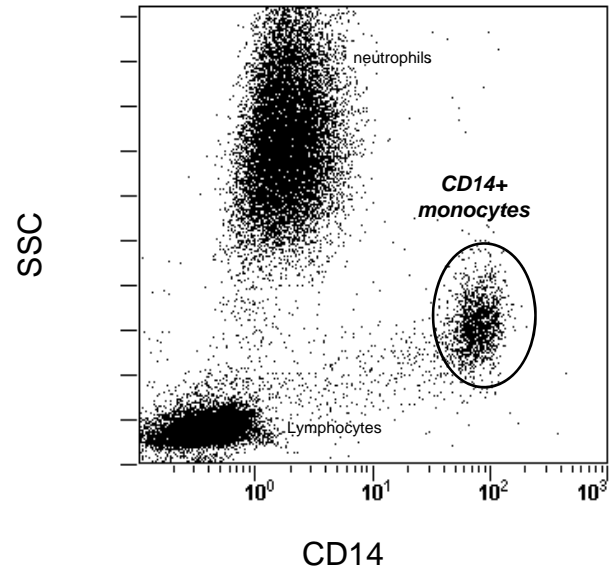

(b) Gated on CD14+ monocytes

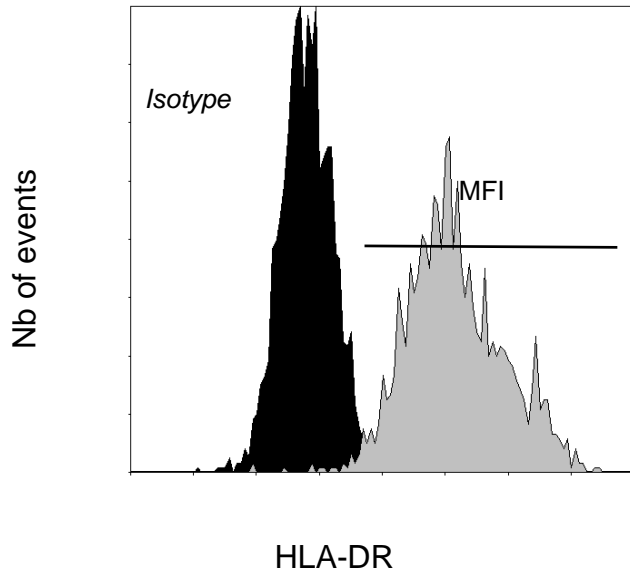

Supplement: MOESM2 [file 9732652]
